# Supplementary material for: Detection, prevalence, and transmission of avian hematozoa in waterfowl at the Arctic/sub-Arctic interface: co-infections, viral interactions, and sources of variation
Source: PubMed Central journal article supplement (PMC4936110; doi:10.1186/s13071-016-1666-3), 2016-07-07
Supplement: 13071_2016_1666_MOESM2_ESM.pdf [file 13071_2016_1666_MOESM2_ESM.pdf]

**Table S13. Class-specific estimates of *Leucocytozoon* prevalence ( $\hat{\Psi}$ ) and 95% CIs relative to co-infection status with *Haemoproteus*.**

| Species                    | Age | Sex | Month | Without <i>Haemoproteus</i> |      |      |      | With <i>Haemoproteus</i> |      |      |      | Mean         |      |      |      |
|----------------------------|-----|-----|-------|-----------------------------|------|------|------|--------------------------|------|------|------|--------------|------|------|------|
|                            |     |     |       | $\hat{\Psi}$                | SE   | LCI  | UCI  | $\hat{\Psi}$             | SE   | LCI  | UCI  | $\hat{\Psi}$ | SE   | LCI  | UCI  |
| Mallard                    | Ad  | M   | May   | 0.40                        | 0.10 | 0.23 | 0.60 | 0.62                     | 0.09 | 0.43 | 0.78 | 0.55         | 0.10 | 0.36 | 0.72 |
|                            | Ad  | F   | May   | 0.14                        | 0.07 | 0.05 | 0.33 | 0.28                     | 0.11 | 0.11 | 0.54 | 0.18         | 0.08 | 0.07 | 0.40 |
|                            | Ad  | B   | Jun   | 0.69                        | 0.10 | 0.47 | 0.85 | 0.85                     | 0.06 | 0.69 | 0.93 | 0.80         | 0.07 | 0.62 | 0.91 |
|                            | Ad  | B   | Aug   | 0.53                        | 0.04 | 0.45 | 0.61 | 0.73                     | 0.04 | 0.65 | 0.81 | 0.60         | 0.04 | 0.52 | 0.68 |
|                            | Juv | B   | Aug   | 0.11                        | 0.02 | 0.07 | 0.15 | 0.22                     | 0.05 | 0.15 | 0.33 | 0.11         | 0.02 | 0.08 | 0.16 |
| Northern pintail           | Ad  | M   | May   | 0.44                        | 0.08 | 0.30 | 0.59 | 0.66                     | 0.07 | 0.51 | 0.79 | 0.51         | 0.08 | 0.36 | 0.65 |
|                            | Ad  | F   | May   | 0.16                        | 0.07 | 0.06 | 0.35 | 0.31                     | 0.12 | 0.13 | 0.57 | 0.22         | 0.09 | 0.09 | 0.46 |
|                            | Ad  | B   | Jun   | 0.65                        | 0.08 | 0.48 | 0.78 | 0.82                     | 0.06 | 0.68 | 0.90 | 0.71         | 0.07 | 0.55 | 0.83 |
|                            | Ad  | B   | Aug   | 0.45                        | 0.04 | 0.37 | 0.53 | 0.66                     | 0.05 | 0.56 | 0.75 | 0.50         | 0.04 | 0.42 | 0.58 |
|                            | Juv | B   | Aug   | 0.38                        | 0.03 | 0.32 | 0.45 | 0.60                     | 0.05 | 0.50 | 0.70 | 0.40         | 0.03 | 0.33 | 0.46 |
| American green-winged teal | Ad  | B   | Aug   | 0.55                        | 0.06 | 0.43 | 0.66 | 0.75                     | 0.05 | 0.63 | 0.83 | 0.61         | 0.06 | 0.49 | 0.71 |
|                            | Juv | B   | Aug   | 0.28                        | 0.04 | 0.21 | 0.37 | 0.49                     | 0.06 | 0.36 | 0.61 | 0.29         | 0.04 | 0.21 | 0.38 |
| American wigeon            | Ad  | M   | May   | 0.81                        | 0.06 | 0.68 | 0.90 | 0.91                     | 0.03 | 0.83 | 0.96 | 0.86         | 0.05 | 0.75 | 0.93 |
|                            | Ad  | F   | May   | 0.50                        | 0.12 | 0.28 | 0.72 | 0.71                     | 0.10 | 0.48 | 0.87 | 0.53         | 0.12 | 0.30 | 0.74 |
|                            | Ad  | B   | Jun   | 0.93                        | 0.07 | 0.64 | 0.99 | 0.97                     | 0.03 | 0.81 | 1.00 | 0.96         | 0.04 | 0.78 | 1.00 |
| Lesser scaup               | Ad  | M   | May   | 0.57                        | 0.07 | 0.43 | 0.70 | 0.76                     | 0.06 | 0.63 | 0.86 | 0.63         | 0.07 | 0.49 | 0.75 |
|                            | Ad  | F   | May   | 0.24                        | 0.09 | 0.11 | 0.44 | 0.43                     | 0.12 | 0.22 | 0.66 | 0.28         | 0.10 | 0.13 | 0.49 |

Estimates of mean prevalence were calculated using class-specific apparent prevalence of *Haemoproteus*. Age was classified as adult (Ad) or juvenile (Juv); B depicts estimates for both sexes. Month refers to the capture occasions when birds were sampled (May = 17 May – 27 May; Jun = 10 June – 19 June; Aug = 28 July – 20 August).

**Table S14. Class-specific estimates of *Haemoproteus* prevalence ( $\hat{\Psi}$ ) and 95% CIs relative to co-infection status with *Leucocytozoon*.**

| Species                    | Age | Sex | Month | Without <i>Leucocytozoon</i> |      |      |      | With <i>Leucocytozoon</i> |      |      |      | Mean         |      |      |      |
|----------------------------|-----|-----|-------|------------------------------|------|------|------|---------------------------|------|------|------|--------------|------|------|------|
|                            |     |     |       | $\hat{\Psi}$                 | SE   | LCI  | UCI  | $\hat{\Psi}$              | SE   | LCI  | UCI  | $\hat{\Psi}$ | SE   | LCI  | UCI  |
| Mallard                    | Ad  | M   | May   | 0.56                         | 0.10 | 0.36 | 0.74 | 0.73                      | 0.08 | 0.55 | 0.86 | 0.67         | 0.09 | 0.47 | 0.81 |
|                            | Ad  | F   | May   | 0.45                         | 0.14 | 0.21 | 0.71 | 0.64                      | 0.13 | 0.36 | 0.85 | 0.45         | 0.14 | 0.21 | 0.71 |
|                            | Ad  | B   | Jun   | 0.52                         | 0.11 | 0.32 | 0.72 | 0.71                      | 0.09 | 0.52 | 0.85 | 0.67         | 0.09 | 0.48 | 0.82 |
|                            | Ad  | M   | Aug   | 0.33                         | 0.05 | 0.23 | 0.44 | 0.52                      | 0.06 | 0.41 | 0.62 | 0.45         | 0.05 | 0.34 | 0.55 |
|                            | Ad  | F   | Aug   | 0.16                         | 0.04 | 0.10 | 0.24 | 0.30                      | 0.05 | 0.21 | 0.41 | 0.23         | 0.04 | 0.15 | 0.32 |
|                            | Juv | M   | Aug   | 0.07                         | 0.03 | 0.03 | 0.14 | 0.13                      | 0.05 | 0.06 | 0.26 | 0.07         | 0.03 | 0.03 | 0.15 |
| Northern pintail           | Ad  | M   | May   | 0.23                         | 0.06 | 0.13 | 0.37 | 0.39                      | 0.08 | 0.25 | 0.56 | 0.30         | 0.07 | 0.18 | 0.45 |
|                            | Ad  | F   | May   | 0.16                         | 0.08 | 0.06 | 0.37 | 0.29                      | 0.12 | 0.12 | 0.57 | 0.29         | 0.12 | 0.12 | 0.57 |
|                            | Ad  | B   | Jun   | 0.20                         | 0.06 | 0.11 | 0.34 | 0.35                      | 0.08 | 0.21 | 0.52 | 0.30         | 0.07 | 0.18 | 0.46 |
|                            | Ad  | M   | Aug   | 0.04                         | 0.03 | 0.01 | 0.13 | 0.09                      | 0.05 | 0.03 | 0.25 | 0.06         | 0.03 | 0.02 | 0.17 |
|                            | Ad  | F   | Aug   | 0.24                         | 0.04 | 0.17 | 0.33 | 0.41                      | 0.05 | 0.31 | 0.51 | 0.32         | 0.04 | 0.24 | 0.41 |
|                            | Juv | B   | Aug   | 0.05                         | 0.01 | 0.03 | 0.09 | 0.11                      | 0.03 | 0.06 | 0.17 | 0.07         | 0.02 | 0.04 | 0.11 |
| American green-winged teal | Ad  | M   | Aug   | 0.17                         | 0.05 | 0.09 | 0.28 | 0.30                      | 0.07 | 0.19 | 0.45 | 0.23         | 0.06 | 0.14 | 0.37 |
|                            | Ad  | F   | Aug   | 0.23                         | 0.07 | 0.12 | 0.41 | 0.40                      | 0.10 | 0.24 | 0.60 | 0.34         | 0.09 | 0.19 | 0.53 |
|                            | Juv | B   | Aug   | 0.04                         | 0.02 | 0.02 | 0.08 | 0.08                      | 0.03 | 0.04 | 0.17 | 0.05         | 0.02 | 0.02 | 0.10 |
| American wigeon            | Ad  | M   | May   | 0.23                         | 0.06 | 0.14 | 0.36 | 0.39                      | 0.07 | 0.27 | 0.53 | 0.36         | 0.07 | 0.25 | 0.50 |
|                            | Ad  | F   | May   | 0.16                         | 0.07 | 0.07 | 0.34 | 0.30                      | 0.11 | 0.13 | 0.53 | 0.23         | 0.09 | 0.10 | 0.45 |
|                            | Ad  | B   | Jun   | 0.63                         | 0.12 | 0.38 | 0.83 | 0.79                      | 0.08 | 0.59 | 0.91 | 0.79         | 0.08 | 0.58 | 0.91 |
| Lesser scaup               | Ad  | M   | May   | 0.20                         | 0.05 | 0.12 | 0.32 | 0.36                      | 0.07 | 0.23 | 0.50 | 0.30         | 0.06 | 0.19 | 0.43 |
|                            | Ad  | F   | May   | 0.14                         | 0.06 | 0.06 | 0.31 | 0.26                      | 0.10 | 0.11 | 0.50 | 0.16         | 0.07 | 0.06 | 0.34 |

Estimates of mean prevalence were calculated using class-specific apparent prevalence of *Leucocytozoon*. Age was classified as adult (Ad) or juvenile (Juv); B depicts estimates for both sexes. Month refers to the capture occasions when birds were sampled (May = 17 May – 27 May; Jun = 10 June – 19 June; Aug = 28 July – 20 August).

**Table S15. Class-specific estimates of *Leucocytozoon* prevalence ( $\hat{\Psi}$ ) and 95% CIs relative to body condition index (BCI).**

| Species                    | Age        | Sex      | Month      | BCI = 10th percentile |             |             |             | BCI = 90th percentile |             |             |             | BCI = 50th percentile |             |             |             |
|----------------------------|------------|----------|------------|-----------------------|-------------|-------------|-------------|-----------------------|-------------|-------------|-------------|-----------------------|-------------|-------------|-------------|
|                            |            |          |            | $\hat{\Psi}$          | SE          | LCI         | UCI         | $\hat{\Psi}$          | SE          | LCI         | UCI         | $\hat{\Psi}$          | SE          | LCI         | UCI         |
| Mallard                    | Ad         | M        | May        | 0.66                  | 0.09        | 0.47        | 0.81        | 0.64                  | 0.09        | 0.45        | 0.80        | 0.65                  | 0.09        | 0.46        | 0.80        |
|                            | Ad         | F        | May        | 0.50                  | 0.14        | 0.25        | 0.75        | 0.47                  | 0.14        | 0.23        | 0.73        | 0.49                  | 0.14        | 0.24        | 0.74        |
|                            | Ad         | M        | Jun        | 0.68                  | 0.09        | 0.49        | 0.83        | 0.65                  | 0.10        | 0.45        | 0.81        | 0.67                  | 0.09        | 0.48        | 0.82        |
|                            | Ad         | F        | Jun        | 0.67                  | 0.09        | 0.48        | 0.82        | 0.67                  | 0.09        | 0.47        | 0.82        | 0.67                  | 0.09        | 0.48        | 0.82        |
|                            | Ad         | M        | Aug        | 0.47                  | 0.06        | 0.35        | 0.58        | 0.43                  | 0.06        | 0.32        | 0.55        | 0.45                  | 0.05        | 0.35        | 0.55        |
|                            | Ad         | F        | Aug        | 0.25                  | 0.05        | 0.17        | 0.35        | 0.22                  | 0.05        | 0.14        | 0.32        | 0.23                  | 0.04        | 0.16        | 0.32        |
|                            | <b>Juv</b> | <b>M</b> | <b>Aug</b> | <b>0.10</b>           | <b>0.04</b> | <b>0.05</b> | <b>0.21</b> | <b>0.04</b>           | <b>0.02</b> | <b>0.02</b> | <b>0.10</b> | <b>0.07</b>           | <b>0.03</b> | <b>0.03</b> | <b>0.14</b> |
|                            | <b>Juv</b> | <b>F</b> | <b>Aug</b> | <b>0.11</b>           | <b>0.04</b> | <b>0.05</b> | <b>0.22</b> | <b>0.05</b>           | <b>0.02</b> | <b>0.02</b> | <b>0.11</b> | <b>0.07</b>           | <b>0.03</b> | <b>0.03</b> | <b>0.14</b> |
| Northern pintail           | Ad         | M        | May        | 0.32                  | 0.07        | 0.20        | 0.48        | 0.30                  | 0.07        | 0.18        | 0.45        | 0.31                  | 0.07        | 0.19        | 0.46        |
|                            | Ad         | F        | May        | N/A                   |             |             |             | N/A                   |             |             |             | 0.18                  | 0.09        | 0.07        | 0.41        |
|                            | Ad         | M        | Jun        | 0.32                  | 0.08        | 0.19        | 0.50        | 0.29                  | 0.08        | 0.16        | 0.46        | 0.31                  | 0.07        | 0.18        | 0.47        |
|                            | Ad         | F        | Jun        | 0.33                  | 0.08        | 0.19        | 0.50        | 0.29                  | 0.08        | 0.16        | 0.46        | 0.31                  | 0.07        | 0.18        | 0.47        |
|                            | Ad         | M        | Aug        | 0.07                  | 0.04        | 0.02        | 0.19        | 0.06                  | 0.03        | 0.02        | 0.17        | 0.06                  | 0.04        | 0.02        | 0.18        |
|                            | Ad         | F        | Aug        | 0.35                  | 0.05        | 0.25        | 0.45        | 0.31                  | 0.05        | 0.22        | 0.42        | 0.33                  | 0.04        | 0.25        | 0.42        |
|                            | <b>Juv</b> | <b>M</b> | <b>Aug</b> | <b>0.12</b>           | <b>0.04</b> | <b>0.07</b> | <b>0.21</b> | <b>0.04</b>           | <b>0.02</b> | <b>0.02</b> | <b>0.08</b> | <b>0.07</b>           | <b>0.02</b> | <b>0.04</b> | <b>0.11</b> |
|                            | <b>Juv</b> | <b>F</b> | <b>Aug</b> | <b>0.11</b>           | <b>0.03</b> | <b>0.06</b> | <b>0.18</b> | <b>0.04</b>           | <b>0.02</b> | <b>0.02</b> | <b>0.09</b> | <b>0.07</b>           | <b>0.02</b> | <b>0.04</b> | <b>0.11</b> |
| American green-winged teal | Ad         | M        | Aug        | 0.26                  | 0.06        | 0.15        | 0.40        | 0.23                  | 0.06        | 0.13        | 0.36        | 0.24                  | 0.06        | 0.15        | 0.37        |
|                            | Ad         | F        | Aug        | 0.36                  | 0.09        | 0.20        | 0.55        | 0.33                  | 0.09        | 0.18        | 0.52        | 0.34                  | 0.09        | 0.20        | 0.53        |
|                            | <b>Juv</b> | <b>M</b> | <b>Aug</b> | <b>0.08</b>           | <b>0.03</b> | <b>0.03</b> | <b>0.16</b> | <b>0.03</b>           | <b>0.01</b> | <b>0.01</b> | <b>0.07</b> | <b>0.05</b>           | <b>0.02</b> | <b>0.02</b> | <b>0.10</b> |
|                            | <b>Juv</b> | <b>F</b> | <b>Aug</b> | <b>0.08</b>           | <b>0.03</b> | <b>0.04</b> | <b>0.18</b> | <b>0.03</b>           | <b>0.01</b> | <b>0.01</b> | <b>0.07</b> | <b>0.05</b>           | <b>0.02</b> | <b>0.02</b> | <b>0.10</b> |
| American wigeon            | Ad         | M        | May        | 0.38                  | 0.07        | 0.26        | 0.52        | 0.36                  | 0.07        | 0.24        | 0.49        | 0.37                  | 0.07        | 0.25        | 0.50        |
|                            | Ad         | F        | May        | 0.24                  | 0.10        | 0.10        | 0.47        | 0.21                  | 0.09        | 0.09        | 0.43        | 0.23                  | 0.09        | 0.10        | 0.44        |
|                            | Ad         | M        | Jun        | 0.79                  | 0.08        | 0.59        | 0.91        | 0.78                  | 0.09        | 0.56        | 0.90        | 0.79                  | 0.08        | 0.58        | 0.91        |
|                            | Ad         | F        | Jun        | 0.79                  | 0.08        | 0.58        | 0.91        | 0.78                  | 0.09        | 0.57        | 0.91        | 0.79                  | 0.08        | 0.58        | 0.91        |
| Lesser scaup               | Ad         | M        | May        | 0.31                  | 0.07        | 0.19        | 0.46        | 0.29                  | 0.06        | 0.18        | 0.43        | 0.30                  | 0.06        | 0.19        | 0.43        |
|                            | Ad         | F        | May        | 0.18                  | 0.08        | 0.08        | 0.38        | 0.17                  | 0.07        | 0.07        | 0.36        | 0.17                  | 0.07        | 0.07        | 0.37        |

Bold indicates estimates from BCI coefficient with 85% CIs that did not contain zero. Age was classified as adult (Ad) or juvenile (Juv). Month refers to the capture occasions when birds were sampled (May = 17 May – 27 May; Jun = 10 June – 19 June; Aug = 28 July – 20 August). N/A indicates insufficient sample size to estimate BCI effect.

**Table S16. Class-specific estimates of *Haemoproteus* prevalence ( $\hat{\Psi}$ ) and 95% CIs relative to body condition index (BCI).**

| Species                    | Age        | Sex      | Month      | BCI = 10th percentile |             |             |             | BCI = 90th percentile |             |             |             | BCI = 50th percentile |             |             |             |
|----------------------------|------------|----------|------------|-----------------------|-------------|-------------|-------------|-----------------------|-------------|-------------|-------------|-----------------------|-------------|-------------|-------------|
|                            |            |          |            | $\hat{\Psi}$          | SE          | LCI         | UCI         | $\hat{\Psi}$          | SE          | LCI         | UCI         | $\hat{\Psi}$          | SE          | LCI         | UCI         |
| Mallard                    | Ad         | M        | May        | 0.52                  | 0.10        | 0.34        | 0.70        | 0.56                  | 0.10        | 0.37        | 0.74        | 0.54                  | 0.09        | 0.36        | 0.71        |
|                            | Ad         | F        | May        | 0.19                  | 0.09        | 0.07        | 0.43        | 0.22                  | 0.10        | 0.08        | 0.46        | 0.21                  | 0.09        | 0.08        | 0.44        |
|                            | Ad         | M        | Jun        | 0.78                  | 0.08        | 0.58        | 0.90        | 0.81                  | 0.07        | 0.63        | 0.92        | 0.79                  | 0.08        | 0.61        | 0.90        |
|                            | Ad         | F        | Jun        | 0.79                  | 0.08        | 0.60        | 0.90        | 0.80                  | 0.07        | 0.62        | 0.91        | 0.79                  | 0.08        | 0.61        | 0.90        |
|                            | Ad         | M        | Aug        | 0.57                  | 0.05        | 0.46        | 0.67        | 0.62                  | 0.05        | 0.52        | 0.72        | 0.60                  | 0.04        | 0.52        | 0.67        |
|                            | Ad         | F        | Aug        | 0.56                  | 0.06        | 0.45        | 0.67        | 0.63                  | 0.05        | 0.52        | 0.73        | 0.60                  | 0.04        | 0.52        | 0.67        |
|                            | Juv        | M        | Aug        | 0.10                  | 0.02        | 0.06        | 0.15        | 0.12                  | 0.03        | 0.08        | 0.19        | 0.11                  | 0.02        | 0.07        | 0.16        |
|                            | Juv        | F        | Aug        | 0.10                  | 0.02        | 0.06        | 0.16        | 0.12                  | 0.03        | 0.08        | 0.18        | 0.11                  | 0.02        | 0.07        | 0.16        |
| Northern pintail           | <b>Ad</b>  | <b>M</b> | <b>May</b> | <b>0.57</b>           | <b>0.08</b> | <b>0.42</b> | <b>0.71</b> | <b>0.44</b>           | <b>0.08</b> | <b>0.30</b> | <b>0.59</b> | <b>0.51</b>           | <b>0.07</b> | <b>0.37</b> | <b>0.65</b> |
|                            | <b>Ad</b>  | <b>F</b> | <b>May</b> | <b>N/A</b>            |             |             |             | <b>N/A</b>            |             |             |             | <b>0.19</b>           | <b>0.08</b> | <b>0.07</b> | <b>0.40</b> |
|                            | <b>Ad</b>  | <b>M</b> | <b>Jun</b> | <b>0.77</b>           | <b>0.07</b> | <b>0.62</b> | <b>0.88</b> | <b>0.61</b>           | <b>0.09</b> | <b>0.43</b> | <b>0.77</b> | <b>0.70</b>           | <b>0.07</b> | <b>0.55</b> | <b>0.83</b> |
|                            | <b>Ad</b>  | <b>F</b> | <b>Jun</b> | <b>0.78</b>           | <b>0.07</b> | <b>0.63</b> | <b>0.88</b> | <b>0.62</b>           | <b>0.09</b> | <b>0.44</b> | <b>0.77</b> | <b>0.70</b>           | <b>0.07</b> | <b>0.55</b> | <b>0.83</b> |
|                            | <b>Ad</b>  | <b>M</b> | <b>Aug</b> | <b>0.57</b>           | <b>0.05</b> | <b>0.48</b> | <b>0.66</b> | <b>0.41</b>           | <b>0.05</b> | <b>0.32</b> | <b>0.51</b> | <b>0.50</b>           | <b>0.04</b> | <b>0.42</b> | <b>0.58</b> |
|                            | <b>Ad</b>  | <b>F</b> | <b>Aug</b> | <b>0.58</b>           | <b>0.05</b> | <b>0.48</b> | <b>0.67</b> | <b>0.40</b>           | <b>0.05</b> | <b>0.30</b> | <b>0.51</b> | <b>0.50</b>           | <b>0.04</b> | <b>0.42</b> | <b>0.58</b> |
|                            | <b>Juv</b> | <b>M</b> | <b>Aug</b> | <b>0.50</b>           | <b>0.05</b> | <b>0.40</b> | <b>0.59</b> | <b>0.31</b>           | <b>0.04</b> | <b>0.23</b> | <b>0.40</b> | <b>0.40</b>           | <b>0.03</b> | <b>0.33</b> | <b>0.46</b> |
|                            | <b>Juv</b> | <b>F</b> | <b>Aug</b> | <b>0.48</b>           | <b>0.04</b> | <b>0.39</b> | <b>0.56</b> | <b>0.32</b>           | <b>0.04</b> | <b>0.25</b> | <b>0.40</b> | <b>0.40</b>           | <b>0.03</b> | <b>0.33</b> | <b>0.46</b> |
| American green-winged teal | Ad         | M        | Aug        | 0.62                  | 0.07        | 0.47        | 0.75        | 0.58                  | 0.07        | 0.43        | 0.72        | 0.60                  | 0.06        | 0.48        | 0.70        |
|                            | Ad         | F        | Aug        | 0.61                  | 0.07        | 0.48        | 0.74        | 0.58                  | 0.07        | 0.45        | 0.71        | 0.60                  | 0.06        | 0.48        | 0.70        |
|                            | Juv        | M        | Aug        | 0.31                  | 0.06        | 0.20        | 0.44        | 0.27                  | 0.06        | 0.18        | 0.40        | 0.29                  | 0.04        | 0.22        | 0.38        |
|                            | Juv        | F        | Aug        | 0.31                  | 0.07        | 0.20        | 0.46        | 0.27                  | 0.05        | 0.18        | 0.39        | 0.29                  | 0.04        | 0.22        | 0.38        |
| American wigeon            | <b>Ad</b>  | <b>M</b> | <b>May</b> | <b>0.71</b>           | <b>0.09</b> | <b>0.50</b> | <b>0.86</b> | <b>0.95</b>           | <b>0.03</b> | <b>0.82</b> | <b>0.99</b> | <b>0.88</b>           | <b>0.05</b> | <b>0.75</b> | <b>0.94</b> |
|                            | <b>Ad</b>  | <b>F</b> | <b>May</b> | <b>0.25</b>           | <b>0.13</b> | <b>0.08</b> | <b>0.57</b> | <b>0.87</b>           | <b>0.11</b> | <b>0.48</b> | <b>0.98</b> | <b>0.61</b>           | <b>0.13</b> | <b>0.34</b> | <b>0.83</b> |
|                            | <b>Ad</b>  | <b>M</b> | <b>Jun</b> | <b>0.93</b>           | <b>0.07</b> | <b>0.63</b> | <b>0.99</b> | <b>0.99</b>           | <b>0.02</b> | <b>0.88</b> | <b>1.00</b> | <b>0.97</b>           | <b>0.03</b> | <b>0.80</b> | <b>1.00</b> |
| Lesser scaup               | <b>Ad</b>  | <b>F</b> | <b>Jun</b> | <b>0.94</b>           | <b>0.06</b> | <b>0.67</b> | <b>0.99</b> | <b>0.98</b>           | <b>0.03</b> | <b>0.83</b> | <b>1.00</b> | <b>0.97</b>           | <b>0.03</b> | <b>0.80</b> | <b>1.00</b> |
|                            | Ad         | M        | May        | 0.66                  | 0.11        | 0.42        | 0.83        | 0.60                  | 0.10        | 0.41        | 0.77        | 0.63                  | 0.07        | 0.49        | 0.75        |
|                            | Ad         | F        | May        | 0.29                  | 0.13        | 0.11        | 0.58        | 0.25                  | 0.11        | 0.10        | 0.51        | 0.27                  | 0.10        | 0.13        | 0.49        |

Bold indicates estimates from BCI coefficient with 85% CIs that did not contain zero. Age was classified as adult (Ad) or juvenile (Juv). Month refers to the capture occasions when birds were sampled (May = 17 May – 27 May; Jun = 10 June – 19 June; Aug = 28 July – 20 August). N/A indicates insufficient sample size to estimate BCI effect.
